# Supplementary material for: Platelet Transfusion and Death or Neurodevelopmental Impairment in Children Born Extremely Preterm
Source: PubMed Central journal article supplement (PMC10807258; doi:10.1001/jamanetworkopen.2023.52394), 2024-01-23
Supplement: jamanetwopen-e2352394-s001.pdf [file jamanetwopen-e2352394-s001.pdf]

## Supplementary Online Content

Davenport PE, Wood TR, Heagerty PJ, Sola-Visner MC, Juul SE, Patel RM. Platelet transfusion and death or neurodevelopmental impairment in children born extremely preterm. *JAMA Netw Open*. 2024;7(1):e2352394.  
doi:10.1001/jamanetworkopen.2023.52394

**eFigure 1.** Reduction in Standardized Mean Difference After Stabilized Inverse Propensity Score Weighting

**eFigure 2.** Distribution of Raw Propensity Scores by Platelet Exposure

**eFigure 3.** Flow Diagram of Death and Neurodevelopmental Follow-up Rates for Transfused and Non-Transfused Infants Included in the Study

**eFigure 4.** Variation in Platelet Exposure and Number of Infants Exposed by Study Site

**eTable 1.** Sensitivity Analyses—Any Platelet Exposure

**eTable 2.** Sensitivity Analyses—Number of Platelet Exposures

This supplementary material has been provided by the authors to give readers additional information about their work.

**eFigure 1. Reduction in Standardized Mean Difference after Stabilized Inverse Propensity Score Weighting.**

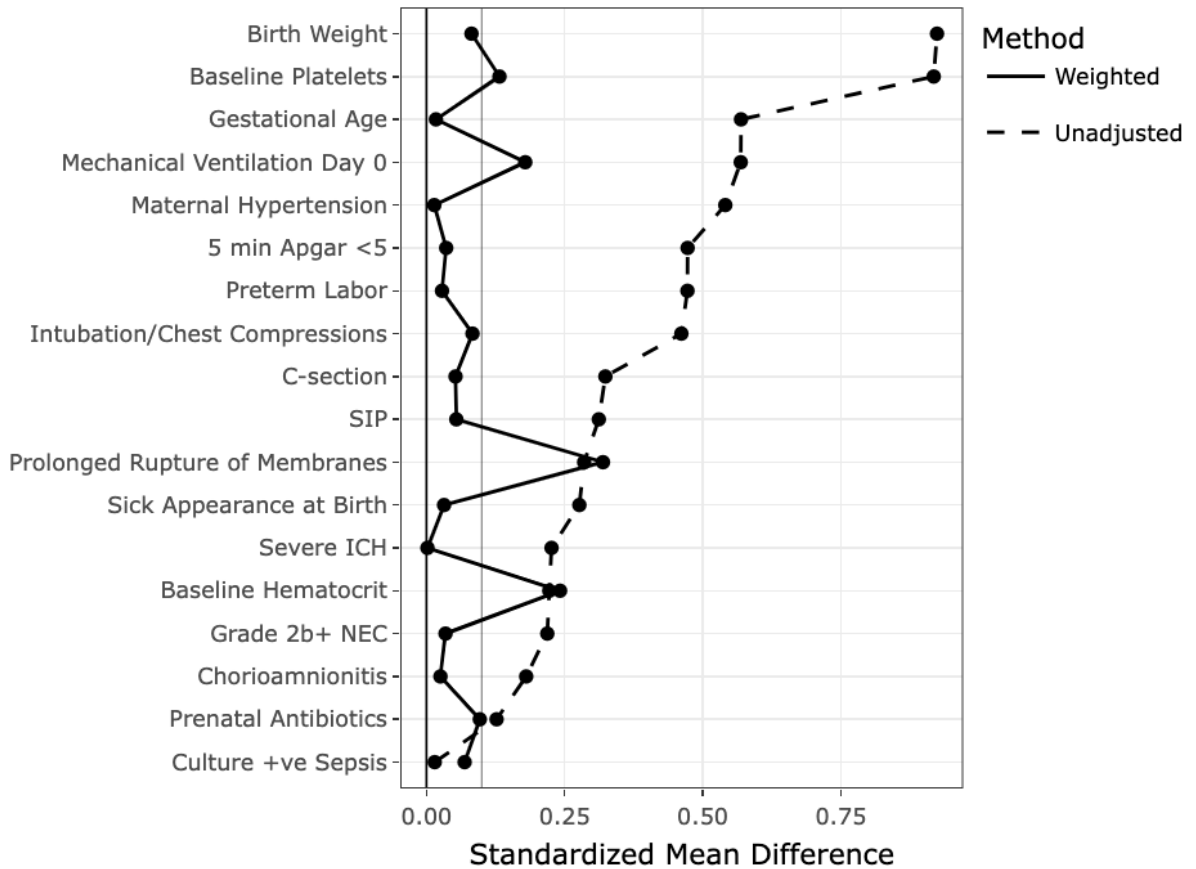

Abbreviations: SIP, spontaneous intestinal perforation; ICH, intracranial/intraventricular hemorrhage; NEC, necrotizing enterocolitis.  
 All events are those occurring prior to first platelet exposure.

**eFigure 2. Distribution of Raw Propensity Scores by Platelet Exposure.**

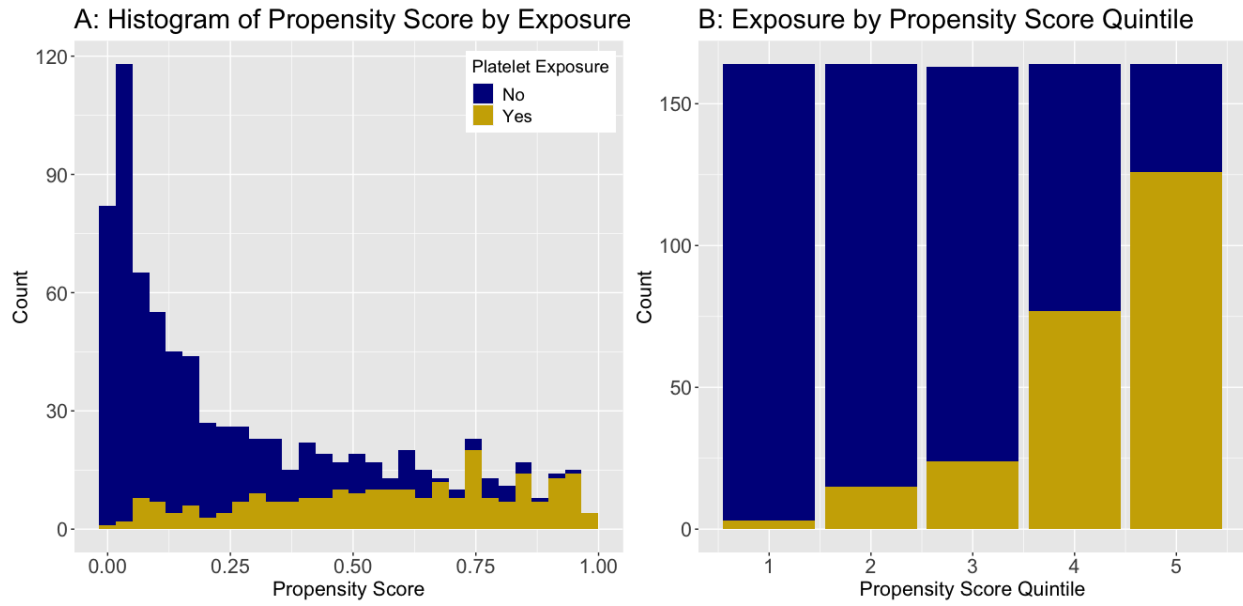

**eFigure 3. Flow Diagram of Death and Neurodevelopmental Follow-up Rates for Transfused and Non-Transfused Infants Included in the Study.**

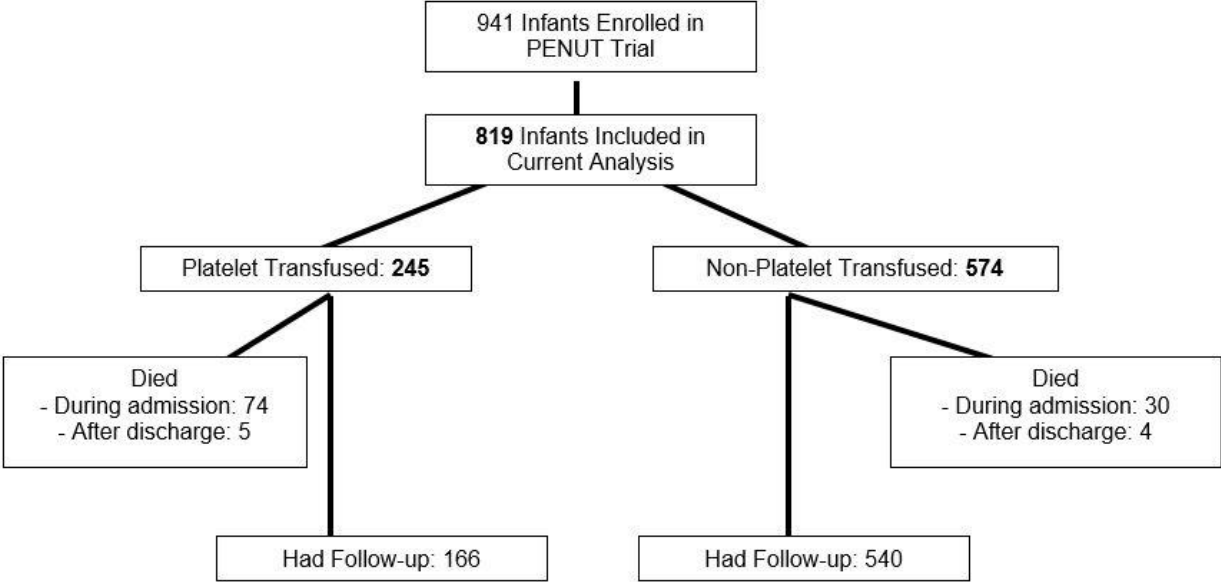

**eFigure 4. Variation in Platelet Exposure and Number of Infants Exposed by Study Site**

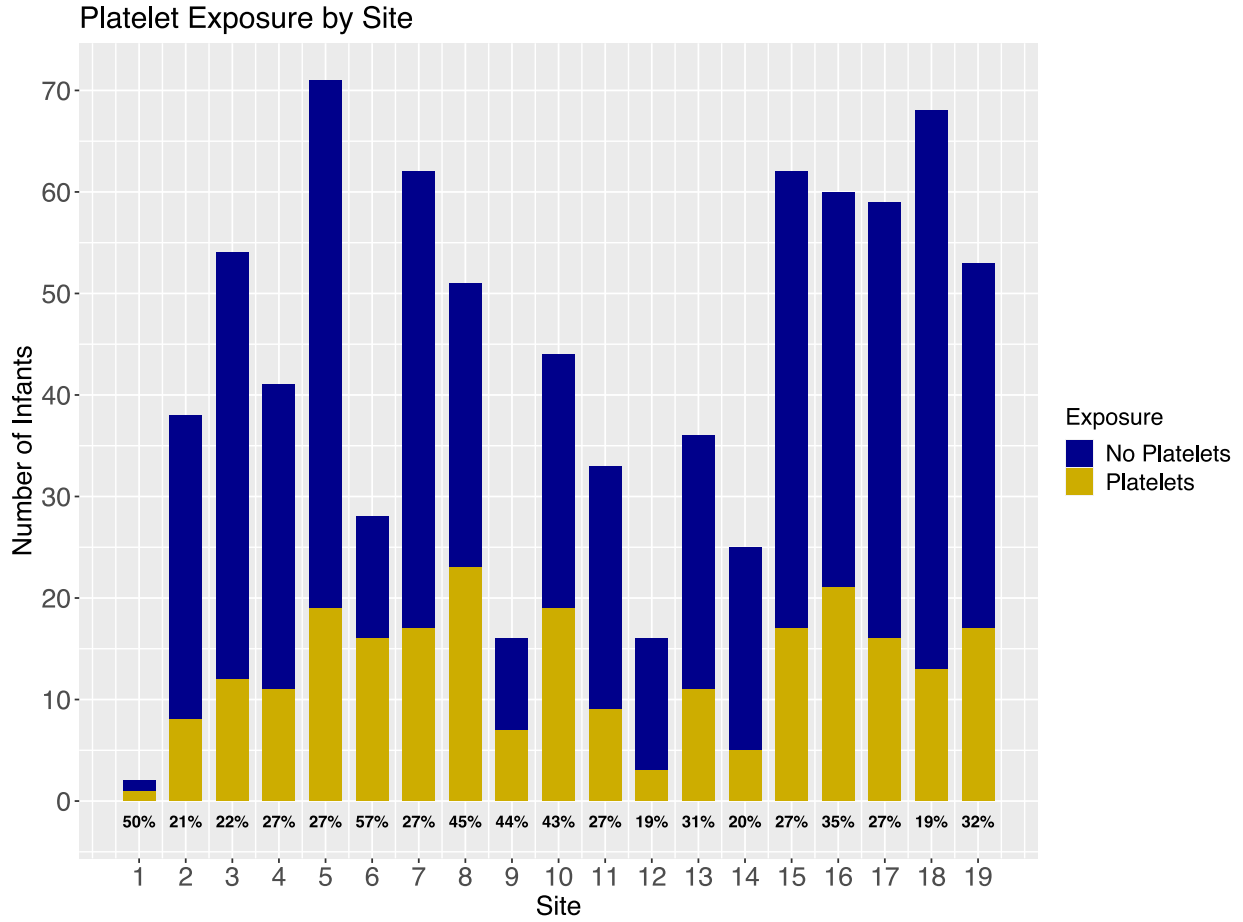

**eTable 1. Sensitivity Analyses – Any Platelet Exposure**

| Outcomes                               | Adjusted OR or Adjusted Mean Difference (95% CI) for Any Platelet Exposure vs. No Exposure |                          |                           |                          |                           |
|----------------------------------------|--------------------------------------------------------------------------------------------|--------------------------|---------------------------|--------------------------|---------------------------|
|                                        | Sensitivity 1                                                                              | Sensitivity 2            | Sensitivity 3             | Sensitivity 4            | Sensitivity 5             |
| <b>Primary Outcome</b>                 |                                                                                            |                          |                           |                          |                           |
| Primary outcome (death/severe NDI)     | <b>2.43 (1.28, 4.59)</b>                                                                   | <b>2.62 (1.74, 4.14)</b> | <b>3.46 (2.30, 5.23)</b>  | <b>3.20 (2.52, 7.38)</b> | <b>2.90 (1.89, 4.46)</b>  |
| <b>Components of Outcome</b>           |                                                                                            |                          |                           |                          |                           |
| Death                                  | <b>3.79 (1.84, 7.82)</b>                                                                   | <b>3.91 (2.21, 6.90)</b> | <b>4.54 (2.72, 7.56)</b>  | <b>4.12 (2.29, 7.44)</b> | <b>4.06 (2.31, 7.12)</b>  |
| Severe NDI (survivors)                 | 0.98 (0.45, 2.13)                                                                          | 1.43 (0.77, 2.65)        | <b>1.98 (1.11, 3.52)</b>  | 1.65 (0.87, 3.13)        | <b>1.89 (0.997, 3.57)</b> |
| <b>Secondary Outcomes (binary)</b>     |                                                                                            |                          |                           |                          |                           |
| Death or Moderate-Severe NDI           | 1.65 (0.92, 2.97)                                                                          | <b>2.16 (1.47, 3.17)</b> | <b>2.72 (1.87, 3.94)</b>  | <b>2.39 (1.56, 3.66)</b> | <b>2.14 (1.46, 3.13)</b>  |
| Moderate-Severe NDI (survivors)        | 1.04 (0.56, 1.93)                                                                          | 1.45 (0.93, 2.26)        | <b>1.80 (1.19, 2.74)</b>  | 1.51 (0.94, 2.43)        | 1.50 (0.96, 2.33)         |
| <b>Secondary Outcomes (continuous)</b> |                                                                                            |                          |                           |                          |                           |
| BSID-III Cognitive                     | 3.1 (-3.4, 9.6)                                                                            | -0.9 (-4.3, 2.5)         | -2.6 (-5.8, -0.6)         | -2.2 (-5.6, 1.3)         | -2.0 (-5.1, 1.1)          |
| BSID-III Motor                         | <b>-4.4 (-8.1, -0.7)</b>                                                                   | <b>-5.5 (-9.3, -1.7)</b> | <b>-6.6 (-10.1, -3.1)</b> | <b>-6.3 (-10.1, 2.5)</b> | <b>-5.8 (-9.3, -2.4)</b>  |
| BSID-III Language                      | -0.5 (-6.7, 5.8)                                                                           | -3.0 (-7.0, -1.0)        | <b>-3.6 (-7.2, -0.02)</b> | -2.1 (-6.4, 2.2)         | <b>-3.8 (-7.5, -0.1)</b>  |

Bolded point estimates are those whose 95% CIs do not cross 1 (aOR) or 0 (BSID-III subscales)

Sensitivity 1 - Main models with baseline platelet level, baseline hematocrit level, prolonged rupture of membranes, and mechanical ventilation at enrollment included as additional covariates

Sensitivity 2 - Unweighted GEE adjusting for propensity score quintiles

Sensitivity 3 - 1:1 propensity score matched GEE model with clustering by matched pairings

Sensitivity 4 - Weighted GEE models after optimal trimming of outlying propensity scores

Sensitivity 5 - Full regression models with all propensity score variables used as covariates

**eTable 2. Sensitivity Analyses – Number of Platelet Exposures**

| Outcomes                               | Adjusted OR or Adjusted Mean Difference (95% CI) per Each Additional Platelet Transfusion (up to 20) |                          |                          |                           |
|----------------------------------------|------------------------------------------------------------------------------------------------------|--------------------------|--------------------------|---------------------------|
|                                        | Sensitivity 1                                                                                        | Sensitivity 2            | Sensitivity 3            | Sensitivity 4             |
| <b>Primary Outcome</b>                 |                                                                                                      |                          |                          |                           |
| Primary outcome (death/severe NDI)     | <b>1.24 (1.05, 1.46)</b>                                                                             | <b>1.22 (1.12, 1.33)</b> | <b>1.24 (1.11, 1.39)</b> | <b>1.23 (1.13, 1.34)</b>  |
| <b>Components of Outcome</b>           |                                                                                                      |                          |                          |                           |
| Death                                  | <b>1.21 (1.06, 1.40)</b>                                                                             | <b>1.14 (1.07, 1.21)</b> | <b>1.16 (1.06, 1.28)</b> | <b>1.14 (1.07, 1.22)</b>  |
| Severe NDI (survivors)                 | 1.11 (0.999, 1.24)                                                                                   | <b>1.19 (1.07, 1.31)</b> | <b>1.17 (1.03, 1.32)</b> | <b>1.22 (1.11, 1.33)</b>  |
| <b>Secondary Outcomes (binary)</b>     |                                                                                                      |                          |                          |                           |
| Death or Moderate-Severe NDI           | 1.15 (0.99, 1.34)                                                                                    | <b>1.15 (1.05, 1.27)</b> | <b>1.18 (1.05, 1.33)</b> | <b>1.16 (1.05, 1.29)</b>  |
| Moderate-Severe NDI (survivors)        | 1.05 (0.93, 1.19)                                                                                    | 1.09 (0.99, 1.19)        | 1.09 (0.97, 1.21)        | <b>1.10 (1.003, 1.20)</b> |
| <b>Secondary Outcomes (continuous)</b> |                                                                                                      |                          |                          |                           |
| BSID-III Cognitive                     | -0.2 (-1.3, 1.0)                                                                                     | -0.5 (-1.3, 0.2)         | -0.5 (-1.3, 0.4)         | -0.6 (-1.2, 0.1)          |
| BSID-III Motor                         | -1.0 (-2.1, 0.1)                                                                                     | <b>-1.1 (-1.8, -0.3)</b> | <b>-1.3 (-2.3, -0.3)</b> | <b>-1.3 (-2.0, -0.6)</b>  |
| BSID-III Language                      | -0.6 (-1.7, 0.5)                                                                                     | -0.6 (-1.4, 0.1)         | -0.3 (-1.2, -0.5)        | <b>-0.9 (-1.5, -0.2)</b>  |

Bolded point estimates are those whose 95% CIs do not cross 1 (aOR) or 0 (BSID-III subscales)

Sensitivity 1 - Main models with baseline platelet level, baseline hematocrit level, prolonged rupture of membranes, and mechanical ventilation at enrolment as additional covariates

Sensitivity 2 - 1:1 propensity score matched GEE model with clustering by matched pairings

Sensitivity 3 - Weighted GEE models after optimal trimming of outlying propensity scores

Sensitivity 4 - Full regression models with all propensity score variables used as covariates
