# Supplementary material for: Platelet Transfusion and Death or Neurodevelopmental Impairment in Children Born Extremely Preterm
Source: PubMed Central journal article supplement (PMC10807258; doi:10.1001/jamanetworkopen.2023.52394), 2024-01-23
Supplement: jamanetwopen-e2352394-s002.pdf [file jamanetwopen-e2352394-s002.pdf]

## Data Sharing Statement

Davenport. Platelet Transfusion and Death or Neurodevelopmental Impairment in Children Born Extremely Preterm. *JAMA Netw Open*. Published January 23, 2024.  
doi:10.1001/jamanetworkopen.2023.52394

### Data

**Data available:** Yes

**Data types:** Deidentified participant data

**How to access data:** Anyone can request open access to the PENUT data set by following the instructions on the NINDS page: <https://www.ninds.nih.gov/current-research/research-funded-ninds/clinical-research/archived-clinical-research-datasets>

**When available:** With publication

### Supporting Documents

**Document types:** None

### Additional Information

**Who can access the data:** Anyone can request open access to the PENUT data set by following the instructions on the NINDS page: <https://www.ninds.nih.gov/current-research/research-funded-ninds/clinical-research/archived-clinical-research-datasets>

**Types of analyses:** Anyone can request open access to the PENUT data set by following the instructions on the NINDS page: <https://www.ninds.nih.gov/current-research/research-funded-ninds/clinical-research/archived-clinical-research-datasets>

**Mechanisms of data availability:** Anyone can request open access to the PENUT data set by following the instructions on the NINDS page: <https://www.ninds.nih.gov/current-research/research-funded-ninds/clinical-research/archived-clinical-research-datasets>
